# Supplementary material
Source: PubMed Central journal article supplement (PMC4250345)
Supplement: NIHMS618292-supplement-01.pdf [file NIHMS618292-supplement-01.pdf]

## Supplemental data

Fig. S1

**A**

|                          | G5-PEG-NH2 |                  | G7-PEG-NH2 |                  |
|--------------------------|------------|------------------|------------|------------------|
| Mn (g/mol)               | 67700      | from GPC and NMR | 246000     | from GPC and NMR |
| NO. Arms (via titration) | 109        |                  | 371        |                  |
| NO. PEGS (via NMR)       | 8          |                  | 28         |                  |
| NO. Free Arms            | 101        |                  | 343        |                  |
| %PEGylation              | 7.9%       |                  | 8.2%       |                  |

**B**

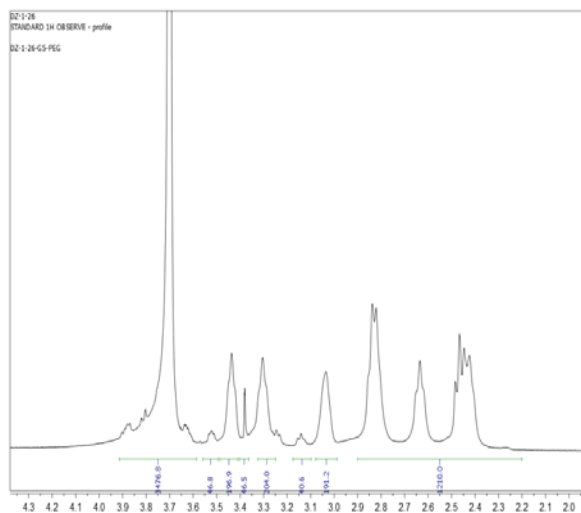

**C**

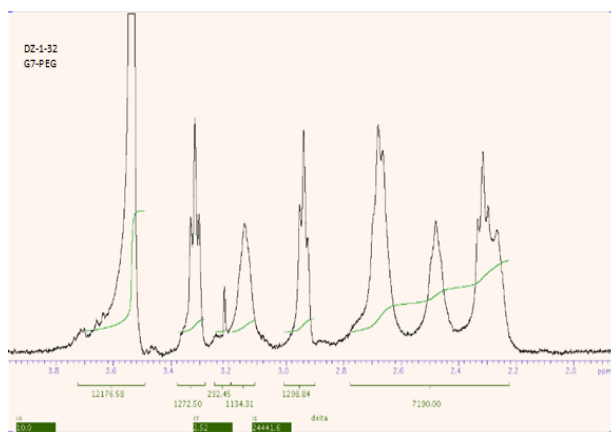

Fig. S1. Characteristic data for PEG-PAMAM dendrimers. (A) Characteristic data for G5-PEG-PAMAM dendrimer and G7-PEG-PAMAM dendrimer. (B)  $^1\text{H}$  NMR data for G5-PEG-PAMAM dendrimer. (C)  $^1\text{H}$  NMR data for G7-PEG-PAMAM dendrimer.

Fig. S2

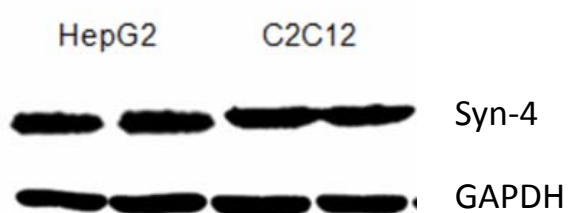

Fig. S2. Comparison in the initial expressions of Syn-4 on HepG2 and C2C12 cells.

Fig. S3

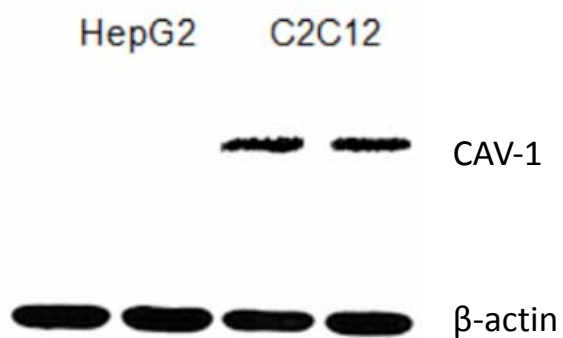

Fig. S3. Comparison in the initial expressions of CAV-1 on HepG2 and C2C12 cells.
